# Supplementary material
Source: PubMed Central journal article supplement (PMC7491088)
Supplement: Supplementary_Data.pdf [file Supplementary_Data.pdf]

Table SI. Stromal cell, immune cell, estimate scores and tumor purity scores of patients with ovarian carcinoma based on the ESTIMATE algorithm.

| Sample           | StromalScore | ImmuneScore | ESTIMATEScore |
|------------------|--------------|-------------|---------------|
| TCGA-61-2003-01A | 2925.995     | 4155.209    | 7081.205      |
| TCGA-61-2002-01A | 2738.311     | 4509.051    | 7247.361      |
| TCGA-61-1919-01A | 3326.774     | 3998.722    | 7325.497      |
| TCGA-61-1721-01A | 3837.137     | 3509.907    | 7347.044      |
| TCGA-36-1576-01A | 3654.4       | 4318.451    | 7972.851      |
| TCGA-36-1569-01A | 2924.013     | 4029.361    | 6953.374      |
| TCGA-31-1959-01A | 3279.121     | 4078.083    | 7357.204      |
| TCGA-31-1956-01A | 3727.734     | 6120.566    | 9848.3        |
| TCGA-31-1953-01A | 2503.872     | 5159.301    | 7663.174      |
| TCGA-29-2427-01A | 2565.279     | 5510.356    | 8075.635      |
| TCGA-29-1768-01A | 3936.688     | 4426.372    | 8363.06       |
| TCGA-29-1710-01A | 2749.837     | 5130.668    | 7880.506      |
| TCGA-29-1695-01A | 3034.951     | 3815.635    | 6850.586      |
| TCGA-25-2401-01A | 3608.218     | 4479.146    | 8087.365      |
| TCGA-25-2042-01A | 4358.639     | 3353.169    | 7711.808      |
| TCGA-25-1633-01A | 3013.563     | 3676.789    | 6690.352      |
| TCGA-25-1628-01A | 3190.625     | 3810.973    | 7001.598      |
| TCGA-25-1626-01A | 4574.88      | 4710.053    | 9284.933      |
| TCGA-25-1623-01A | 3795.378     | 4848.92     | 8644.298      |
| TCGA-24-2293-01A | 3622.314     | 4538.136    | 8160.451      |
| TCGA-24-2035-01A | 3885.991     | 4365.038    | 8251.03       |
| TCGA-24-1930-01A | 2849.678     | 4572.291    | 7421.969      |
| TCGA-24-1550-01A | 3323.062     | 3300.667    | 6623.729      |
| TCGA-24-1434-01A | 3757.357     | 3955.321    | 7712.679      |
| TCGA-24-1425-01A | 3438.063     | 3276.294    | 6714.357      |
| TCGA-24-1422-01A | 3038.119     | 3673.407    | 6711.525      |
| TCGA-23-1116-01A | 3267.507     | 4414.157    | 7681.664      |
| TCGA-20-0991-01A | 1339.353     | 5952.281    | 7291.634      |
| TCGA-13-1499-01A | 2452.537     | 4598.681    | 7051.218      |
| TCGA-13-1411-01A | 3844.977     | 5408.419    | 9253.396      |
| TCGA-13-0886-01A | 2869.875     | 4251.587    | 7121.462      |
| TCGA-13-0768-01A | 3779.816     | 5838.152    | 9617.968      |
| TCGA-04-1357-01A | 1856.786     | 5520.029    | 7376.815      |
| TCGA-04-1338-01A | 2641.442     | 3938.363    | 6579.805      |
| TCGA-10-0938-01A | -2461.82     | -853.726    | -3315.54      |
| TCGA-04-1364-01A | -1894.77     | -1168.56    | -3063.33      |
| TCGA-13-0800-01A | -1560.43     | -1255.82    | -2816.25      |
| TCGA-09-0364-01A | -1030.24     | -1756.05    | -2786.29      |
| TCGA-OY-A56Q-01A | -1429.01     | -1341.7     | -2770.71      |
| TCGA-WR-A838-01A | -1853.98     | -817.262    | -2671.25      |
| TCGA-23-1110-01A | -1103.19     | -1405.57    | -2508.76      |
| TCGA-13-1407-01A | -1540.26     | -763.088    | -2303.35      |
| TCGA-30-1853-01A | -1013.22     | -1270.26    | -2283.47      |
| TCGA-04-1514-01A | -634.919     | -1625.71    | -2260.63      |
| TCGA-25-1634-01A | -1069.54     | -1122.79    | -2192.33      |
| TCGA-04-1350-01A | -1334.36     | -616.48     | -1950.84      |
| TCGA-04-1655-01A | -1314.84     | -568.246    | -1883.08      |
| TCGA-25-1315-01A | -1110.33     | -758.755    | -1869.08      |
| TCGA-61-2092-01A | -2128.02     | 343.7116    | -1784.31      |
| TCGA-13-1409-01A | -709.931     | -1073.98    | -1783.91      |
| TCGA-61-2088-01A | -1316.46     | -436.488    | -1752.95      |
| TCGA-13-0888-01A | -346.775     | -1290.15    | -1636.92      |
| TCGA-24-1567-01A | -1049.1      | -432.571    | -1481.67      |
| TCGA-5X-AA5U-01A | -648.211     | -796.092    | -1444.3       |
| TCGA-61-2098-01A | -629.459     | -797.988    | -1427.45      |

Table SI. Continued.

| Sample           | StromalScore | ImmuneScore | ESTIMATEScore |
|------------------|--------------|-------------|---------------|
| TCGA-29-1697-01A | -1332.96     | 11.21949    | -1321.74      |
| TCGA-24-1419-01A | -1205.34     | -81.0476    | -1286.39      |
| TCGA-24-1544-01A | -1103.9      | -177.836    | -1281.74      |
| TCGA-13-1489-01A | -1434.07     | 192.1459    | -1241.93      |
| TCGA-25-1632-01A | -567.076     | -627.573    | -1194.65      |
| TCGA-04-1542-01A | -695.327     | -492.001    | -1187.33      |
| TCGA-04-1519-01A | -976.896     | -179.544    | -1156.44      |
| TCGA-29-1774-01A | -393.675     | -661.05     | -1054.73      |
| TCGA-VG-A8LO-01A | -1113.19     | 202.8313    | -910.36       |
| TCGA-23-1024-01A | -1657.99     | 842.2804    | -815.709      |
| TCGA-13-1492-01A | -1210.44     | 422.8542    | -787.587      |
| TCGA-24-2027-01A | -542.863     | -221.818    | -764.68       |
| TCGA-36-1571-01A | -587.804     | -158.35     | -746.154      |
| TCGA-13-A5FT-01A | -1229.44     | 511.3802    | -718.062      |
| TCGA-24-1103-01A | -1062.33     | 364.3432    | -697.988      |
| TCGA-13-0720-01A | -1810.05     | 1162.458    | -647.594      |
| TCGA-24-2020-01A | -439.053     | -127.87     | -566.923      |
| TCGA-23-1022-01A | -538.9       | 16.24744    | -522.653      |
| TCGA-09-2048-01A | -452.124     | -26.9058    | -479.03       |
| TCGA-10-0928-01A | -812.136     | 359.7384    | -452.397      |
| TCGA-04-1347-01A | -55.938      | -355.773    | -411.711      |
| TCGA-24-1430-01A | 276.469      | -664.332    | -387.863      |
| TCGA-24-1844-01A | -396.535     | 49.69319    | -346.842      |
| TCGA-24-2036-01A | -488.088     | 160.2811    | -327.806      |
| TCGA-61-1900-01A | -390.733     | 102.0824    | -288.651      |
| TCGA-24-2297-01A | -470.923     | 265.8025    | -205.121      |
| TCGA-23-1111-01A | -415.665     | 312.9327    | -102.732      |
| TCGA-13-0762-01A | -552.744     | 527.6103    | -25.1333      |
| TCGA-24-1560-01A | -751.141     | 843.6031    | 92.4617       |
| TCGA-23-1114-01B | 421.9197     | -294.054    | 127.866       |
| TCGA-04-1651-01A | -1320.32     | 1520.658    | 200.3394      |
| TCGA-36-1577-01A | -141.051     | 425.248     | 284.197       |
| TCGA-23-1809-01A | -128.114     | 483.5963    | 355.4821      |
| TCGA-59-2363-01A | -336.969     | 706.306     | 369.3365      |
| TCGA-24-1558-01A | -386.05      | 776.4756    | 390.4255      |
| TCGA-13-0920-01A | -271.508     | 666.6921    | 395.184       |
| TCGA-10-0936-01A | -1738.24     | 2189.828    | 451.5924      |
| TCGA-24-0979-01A | -634.751     | 1130.534    | 495.7827      |
| TCGA-10-0933-01A | -38.1924     | 545.3966    | 507.2042      |
| TCGA-24-1616-01A | -247.844     | 782.6918    | 534.848       |
| TCGA-24-1467-01A | -552.821     | 1099.52     | 546.6984      |
| TCGA-30-1714-01A | -411.058     | 965.2077    | 554.1496      |
| TCGA-36-1570-01A | -693.893     | 1309.779    | 615.8857      |
| TCGA-10-0927-01A | 583.5808     | 87.03375    | 670.6146      |
| TCGA-13-1477-01A | 325.7215     | 362.0383    | 687.7598      |
| TCGA-57-1586-01A | -875.007     | 1588.007    | 712.9999      |
| TCGA-29-1696-01A | -846.372     | 1572.816    | 726.4438      |
| TCGA-13-1506-01A | -867.828     | 1598.864    | 731.036       |
| TCGA-24-2038-01A | -497.826     | 1229.339    | 731.5129      |
| TCGA-13-0905-01B | -794.771     | 1600.069    | 805.298       |
| TCGA-24-1469-01A | -856.413     | 1683.565    | 827.1525      |
| TCGA-59-A5PD-01A | -374.229     | 1221.414    | 847.1846      |
| TCGA-29-1762-01A | 44.67509     | 820.9321    | 865.6072      |
| TCGA-04-1331-01A | 414.504      | 464.1972    | 878.7012      |
| TCGA-61-1910-01A | -158.133     | 1205.721    | 1047.588      |
| TCGA-25-1321-01A | -223.556     | 1287.915    | 1064.359      |

Table SI. Continued.

| Sample           | StromalScore | ImmuneScore | ESTIMATEScore |
|------------------|--------------|-------------|---------------|
| TCGA-24-1552-01A | 107.5564     | 982.8137    | 1090.37       |
| TCGA-24-1426-01A | -21.8473     | 1116.178    | 1094.33       |
| TCGA-57-1583-01A | 655.3132     | 474.1805    | 1129.494      |
| TCGA-13-0906-01A | -228.542     | 1380.964    | 1152.422      |
| TCGA-04-1362-01A | -539.838     | 1708.957    | 1169.119      |
| TCGA-23-1113-01A | 659.3698     | 511.0519    | 1170.422      |
| TCGA-24-1413-01A | -557.896     | 1740.127    | 1182.231      |
| TCGA-24-0966-01A | -800.985     | 1983.644    | 1182.659      |
| TCGA-13-0891-01A | -146.437     | 1329.679    | 1183.242      |
| TCGA-24-1416-01A | -668.113     | 1859.256    | 1191.143      |
| TCGA-61-2110-01A | -135.905     | 1332.73     | 1196.825      |
| TCGA-25-2400-01A | -199.169     | 1425.405    | 1226.236      |
| TCGA-23-1029-01B | 92.05345     | 1153.497    | 1245.551      |
| TCGA-10-0931-01A | -774.167     | 2042.945    | 1268.778      |
| TCGA-24-1603-01A | -63.6576     | 1344.657    | 1281          |
| TCGA-61-1728-01A | -157.063     | 1529.268    | 1372.205      |
| TCGA-04-1341-01A | 134.4344     | 1244.989    | 1379.423      |
| TCGA-25-1631-01A | 136.1822     | 1335.238    | 1471.42       |
| TCGA-13-1489-02A | -811.158     | 2291.083    | 1479.925      |
| TCGA-25-1316-01A | -4.60093     | 1489.19     | 1484.589      |
| TCGA-23-1107-01A | -506.857     | 1997.25     | 1490.394      |
| TCGA-25-1323-01A | 825.7139     | 693.6508    | 1519.365      |
| TCGA-20-1683-01A | 272.6331     | 1268.061    | 1540.694      |
| TCGA-13-1403-01A | 287.5877     | 1313.281    | 1600.869      |
| TCGA-25-1317-01A | 863.478      | 738.4442    | 1601.922      |
| TCGA-61-2109-01A | -552.988     | 2178.856    | 1625.868      |
| TCGA-04-1648-01A | -580.81      | 2227.1      | 1646.289      |
| TCGA-09-1673-01A | 210.4362     | 1443.815    | 1654.251      |
| TCGA-23-1021-01B | -9.97005     | 1692.291    | 1682.321      |
| TCGA-24-0982-01A | 577.7582     | 1137.608    | 1715.367      |
| TCGA-24-1557-01A | -30.8552     | 1750.961    | 1720.106      |
| TCGA-24-1845-01A | -782.962     | 2524.103    | 1741.141      |
| TCGA-61-1738-01A | -283.076     | 2049.186    | 1766.109      |
| TCGA-25-1627-01A | 305.2634     | 1486.419    | 1791.683      |
| TCGA-13-0923-01A | -535.519     | 2335.324    | 1799.805      |
| TCGA-29-2425-01A | 464.8062     | 1354.309    | 1819.115      |
| TCGA-20-1686-01A | 538.3778     | 1310.856    | 1849.234      |
| TCGA-13-1510-01A | 10.4225      | 1846.965    | 1857.388      |
| TCGA-57-1993-01A | 56.59829     | 1812.205    | 1868.804      |
| TCGA-09-2045-01A | -53.6147     | 1925.233    | 1871.618      |
| TCGA-13-1495-01A | 345.7842     | 1547.234    | 1893.019      |
| TCGA-04-1356-01A | 114.1191     | 1781.18     | 1895.299      |
| TCGA-59-2350-01A | 276.1396     | 1700.274    | 1976.414      |
| TCGA-25-2391-01A | -543.95      | 2520.957    | 1977.007      |
| TCGA-13-0765-01A | -957.764     | 2948.489    | 1990.725      |
| TCGA-29-1703-01A | 349.8373     | 1651.226    | 2001.063      |
| TCGA-24-1471-01A | -280.309     | 2290.464    | 2010.155      |
| TCGA-29-2414-01A | 1481.757     | 583.4753    | 2065.232      |
| TCGA-13-0916-01A | -291.607     | 2376.076    | 2084.468      |
| TCGA-23-1122-01A | 443.1576     | 1648.814    | 2091.972      |
| TCGA-04-1536-01A | 144.5921     | 1977.919    | 2122.511      |
| TCGA-13-0797-01A | -461.934     | 2605.67     | 2143.736      |
| TCGA-24-1604-01A | 227.1355     | 1916.989    | 2144.124      |
| TCGA-13-0887-01A | 311.3055     | 1833.783    | 2145.088      |
| TCGA-24-1423-01A | 493.539      | 1665.405    | 2158.944      |
| TCGA-13-0766-01A | 124.0924     | 2040.403    | 2164.495      |

Table SI. Continued.

| Sample           | StromalScore | ImmuneScore | ESTIMATEScore |
|------------------|--------------|-------------|---------------|
| TCGA-25-2393-01A | 372.5028     | 1795.819    | 2168.322      |
| TCGA-09-2054-01A | 1461.704     | 733.464     | 2195.168      |
| TCGA-13-0724-01A | 388.6749     | 1811.821    | 2200.496      |
| TCGA-13-0727-01A | 349.2914     | 1865.431    | 2214.722      |
| TCGA-29-1691-01A | 410.977      | 1813.22     | 2224.197      |
| TCGA-31-1950-01A | -469.57      | 2719.3      | 2249.729      |
| TCGA-25-1312-01A | 408.821      | 1859.098    | 2267.919      |
| TCGA-13-1487-01A | 1272.588     | 1011.53     | 2284.118      |
| TCGA-23-1028-01A | -179.836     | 2479.045    | 2299.209      |
| TCGA-09-1661-01B | 927.6291     | 1419.404    | 2347.033      |
| TCGA-09-0367-01A | -416.47      | 2763.972    | 2347.502      |
| TCGA-09-0369-01A | 1581.385     | 790.8688    | 2372.254      |
| TCGA-25-1870-01A | 523.9587     | 1860.67     | 2384.628      |
| TCGA-30-1866-01A | -10.1924     | 2396.565    | 2386.373      |
| TCGA-61-1741-01A | 468.4079     | 1941.401    | 2409.809      |
| TCGA-13-0726-01A | 376.0289     | 2045.155    | 2421.183      |
| TCGA-24-2023-01A | 10.57039     | 2431.466    | 2442.036      |
| TCGA-57-1584-01A | 204.8481     | 2239.103    | 2443.951      |
| TCGA-57-1582-01A | 938.4048     | 1546.889    | 2485.294      |
| TCGA-29-A5NZ-01A | 1706.409     | 803.1026    | 2509.512      |
| TCGA-13-1511-01A | 953.9509     | 1558.98     | 2512.931      |
| TCGA-09-1665-01B | 185.4909     | 2341.946    | 2527.437      |
| TCGA-25-1877-01A | 484.5811     | 2059.753    | 2544.334      |
| TCGA-24-1565-01A | -699.991     | 3275.774    | 2575.783      |
| TCGA-24-1549-01A | -146.306     | 2784.383    | 2638.077      |
| TCGA-24-1464-01A | -18.211      | 2730.904    | 2712.693      |
| TCGA-61-2101-01A | 1731.37      | 1034.188    | 2765.558      |
| TCGA-13-0730-01A | 1482.599     | 1333.286    | 2815.885      |
| TCGA-24-1424-01A | 1269.694     | 1551.966    | 2821.661      |
| TCGA-13-1497-01A | 880.8277     | 1963.85     | 2844.677      |
| TCGA-24-2033-01A | 1304.064     | 1543.287    | 2847.351      |
| TCGA-61-2111-01A | 406.0977     | 2459.349    | 2865.447      |
| TCGA-24-2024-01A | 1243.451     | 1631.611    | 2875.062      |
| TCGA-61-1733-01A | 1545.353     | 1339.491    | 2884.845      |
| TCGA-23-1030-01A | 818.9077     | 2075.975    | 2894.883      |
| TCGA-30-1861-01A | 2248.1       | 647.6611    | 2895.761      |
| TCGA-24-1474-01A | 352.5928     | 2600.088    | 2952.68       |
| TCGA-25-1319-01A | 743.0728     | 2271.3      | 3014.373      |
| TCGA-09-1670-01A | 253.0619     | 2779.583    | 3032.645      |
| TCGA-24-0970-01B | 1545.93      | 1494.105    | 3040.036      |
| TCGA-24-1431-01A | 756.3857     | 2296.529    | 3052.915      |
| TCGA-24-1923-01A | 1247.611     | 1811.397    | 3059.008      |
| TCGA-29-1707-02A | -194.893     | 3265.836    | 3070.942      |
| TCGA-24-1105-01A | 1096.288     | 1986.455    | 3082.743      |
| TCGA-59-2348-01A | 1023.268     | 2093.568    | 3116.836      |
| TCGA-61-1724-01A | 1146.779     | 1995.134    | 3141.913      |
| TCGA-09-2051-01A | 266.1438     | 2900.368    | 3166.512      |
| TCGA-29-1763-01A | 1069.969     | 2118.295    | 3188.264      |
| TCGA-29-1776-01A | 1349.108     | 1850.962    | 3200.07       |
| TCGA-13-1501-01A | 1607.806     | 1595.337    | 3203.143      |
| TCGA-61-2008-01A | 926.3618     | 2317.997    | 3244.359      |
| TCGA-13-1488-01A | 525.0744     | 2733.857    | 3258.931      |
| TCGA-61-1736-01B | 522.6905     | 2795.141    | 3317.832      |
| TCGA-09-1669-01A | 760.8418     | 2567.774    | 3328.615      |
| TCGA-24-1418-01A | 1514.385     | 1821.257    | 3335.642      |
| TCGA-10-0937-01A | 164.8099     | 3182.552    | 3347.362      |

Table SI. Continued.

| Sample           | StromalScore | ImmuneScore | ESTIMATEScore |
|------------------|--------------|-------------|---------------|
| TCGA-09-1666-01A | 254.0423     | 3097.786    | 3351.828      |
| TCGA-59-2352-01A | 978.8018     | 2472.908    | 3451.71       |
| TCGA-59-2355-01A | 1042.885     | 2437.588    | 3480.474      |
| TCGA-29-2414-02A | 324.4882     | 3177.22     | 3501.708      |
| TCGA-13-1404-01A | 1401.503     | 2105.274    | 3506.777      |
| TCGA-61-1918-01A | 924.1161     | 2612.114    | 3536.231      |
| TCGA-29-1778-01A | 648.5507     | 2904.077    | 3552.627      |
| TCGA-13-1505-01A | 1834.069     | 1719.466    | 3553.534      |
| TCGA-09-1659-01B | 732.7258     | 2823.539    | 3556.265      |
| TCGA-24-2298-01A | 1889.499     | 1689.025    | 3578.524      |
| TCGA-13-0901-01B | 1653.292     | 1927.096    | 3580.388      |
| TCGA-25-1318-01A | 1534.876     | 2050.322    | 3585.198      |
| TCGA-23-1118-01A | 962.5442     | 2637.22     | 3599.764      |
| TCGA-04-1361-01A | 904.204      | 2717.282    | 3621.486      |
| TCGA-09-2056-01B | 485.1462     | 3228.387    | 3713.534      |
| TCGA-24-2026-01A | 699.0471     | 3073.984    | 3773.032      |
| TCGA-29-1761-01A | 521.2436     | 3260.586    | 3781.829      |
| TCGA-13-0893-01B | 1118.276     | 2671.414    | 3789.689      |
| TCGA-61-2000-01A | 960.5682     | 2846.187    | 3806.755      |
| TCGA-24-2254-01A | 1431.96      | 2414.025    | 3845.985      |
| TCGA-09-2053-01C | 834.005      | 3016.231    | 3850.236      |
| TCGA-31-1944-01A | 1279.296     | 2587.056    | 3866.352      |
| TCGA-04-1365-01A | 244.2997     | 3626.763    | 3871.063      |
| TCGA-61-2008-02A | 330.8148     | 3564.263    | 3895.077      |
| TCGA-23-1109-01A | 1437.304     | 2475.597    | 3912.901      |
| TCGA-13-1410-01A | 1453.904     | 2472.703    | 3926.608      |
| TCGA-25-1329-01A | 1696.847     | 2235.073    | 3931.92       |
| TCGA-13-1485-01A | 2386.259     | 1564.959    | 3951.218      |
| TCGA-61-2102-01A | 2324.32      | 1640.194    | 3964.514      |
| TCGA-13-1483-01A | 1585.574     | 2384.616    | 3970.19       |
| TCGA-61-1914-01A | 1103.915     | 2868.959    | 3972.874      |
| TCGA-30-1862-01A | 1879.255     | 2125.798    | 4005.053      |
| TCGA-61-1995-01A | 439.1712     | 3571.112    | 4010.284      |
| TCGA-61-2104-01A | 635.3852     | 3386.218    | 4021.603      |
| TCGA-57-1994-01A | 299.3013     | 3761.847    | 4061.148      |
| TCGA-13-1496-01A | 141.7307     | 3926.256    | 4067.986      |
| TCGA-25-1322-01A | 1557.508     | 2527.081    | 4084.588      |
| TCGA-29-1694-01A | 1515.144     | 2594.188    | 4109.331      |
| TCGA-29-1770-01A | 2219.077     | 1915.666    | 4134.742      |
| TCGA-13-0913-02A | 873.6392     | 3266.064    | 4139.704      |
| TCGA-04-1343-01A | 1446.326     | 2736.962    | 4183.288      |
| TCGA-13-1512-01A | 1497.769     | 2694.43     | 4192.199      |
| TCGA-23-2077-01A | 1302.905     | 2903.507    | 4206.412      |
| TCGA-13-0804-01A | 458.5924     | 3750.906    | 4209.499      |
| TCGA-13-1509-01A | 1627.007     | 2593.802    | 4220.808      |
| TCGA-23-2084-01A | 1524.078     | 2736.246    | 4260.324      |
| TCGA-29-1693-01A | 1996.715     | 2268.987    | 4265.702      |
| TCGA-04-1332-01A | 2466.901     | 1808.424    | 4275.325      |
| TCGA-24-2290-01A | 1026.524     | 3262.47     | 4288.994      |
| TCGA-13-0897-01A | 1317.341     | 2990.805    | 4308.146      |
| TCGA-61-1907-01A | -131.748     | 4440.98     | 4309.232      |
| TCGA-29-1769-01A | 1501.109     | 2810.23     | 4311.339      |
| TCGA-25-2396-01A | 1293.102     | 3030.469    | 4323.571      |
| TCGA-13-1498-01A | 796.4713     | 3527.471    | 4323.942      |
| TCGA-24-2262-01A | 1278.553     | 3064.629    | 4343.182      |
| TCGA-36-1568-01A | 1267.345     | 3083.964    | 4351.309      |

Table SI. Continued.

| Sample           | StromalScore | ImmuneScore | ESTIMATEScore |
|------------------|--------------|-------------|---------------|
| TCGA-09-2044-01B | 1033.891     | 3349.667    | 4383.558      |
| TCGA-24-1850-01A | 1838.68      | 2562.588    | 4401.268      |
| TCGA-20-1687-01A | 1450.385     | 2964.526    | 4414.911      |
| TCGA-24-1562-01A | 1585.353     | 2841.586    | 4426.939      |
| TCGA-13-0884-01B | 1268.705     | 3180.176    | 4448.881      |
| TCGA-24-1428-01A | 792.928      | 3700.134    | 4493.062      |
| TCGA-24-1104-01A | 985.1148     | 3526.498    | 4511.612      |
| TCGA-29-2428-01A | 740.9267     | 3806.859    | 4547.785      |
| TCGA-61-2097-01A | 1730.062     | 2817.952    | 4548.014      |
| TCGA-23-1123-01A | 586.1999     | 3969.331    | 4555.531      |
| TCGA-23-1120-01A | 1035.038     | 3532.423    | 4567.461      |
| TCGA-36-1574-01A | 1915.564     | 2670.926    | 4586.49       |
| TCGA-23-1119-01A | 1355.775     | 3241.636    | 4597.411      |
| TCGA-24-1928-01A | 2201.801     | 2416.19     | 4617.991      |
| TCGA-13-0725-01A | 1623.58      | 2995.45     | 4619.03       |
| TCGA-25-2404-01A | 2059.007     | 2612.069    | 4671.076      |
| TCGA-23-1027-01A | 1675.649     | 3007.743    | 4683.392      |
| TCGA-09-1662-01A | 1261.838     | 3424.431    | 4686.269      |
| TCGA-13-1408-01A | 2497.886     | 2211.83     | 4709.716      |
| TCGA-13-2060-01A | 1252.516     | 3477.448    | 4729.964      |
| TCGA-24-1846-01A | 1353.432     | 3379.202    | 4732.634      |
| TCGA-13-0714-01A | 1940.696     | 2847.485    | 4788.181      |
| TCGA-24-1551-01A | 682.3194     | 4108.561    | 4790.88       |
| TCGA-29-1705-01A | 2268.828     | 2538.293    | 4807.121      |
| TCGA-24-1843-01A | 1118.864     | 3711.77     | 4830.633      |
| TCGA-29-1784-01A | 708.7792     | 4135.366    | 4844.145      |
| TCGA-61-1725-01A | 1900.87      | 2959.243    | 4860.113      |
| TCGA-13-1405-01A | 1970.648     | 2940.904    | 4911.553      |
| TCGA-24-2281-01A | 880.8359     | 4044.618    | 4925.454      |
| TCGA-25-2399-01A | 1798.48      | 3128.671    | 4927.151      |
| TCGA-61-2012-01A | 1018.829     | 3932.154    | 4950.983      |
| TCGA-29-1766-01A | 2315.129     | 2694.314    | 5009.443      |
| TCGA-09-0366-01A | 503.5041     | 4510.599    | 5014.103      |
| TCGA-29-1711-01A | 1413.241     | 3620.275    | 5033.516      |
| TCGA-25-1328-01A | 2310.299     | 2737.294    | 5047.592      |
| TCGA-24-2280-01A | 3055.167     | 1997.056    | 5052.223      |
| TCGA-29-1783-01A | 1831.644     | 3242.539    | 5074.184      |
| TCGA-09-1668-01B | 1458.032     | 3650.405    | 5108.437      |
| TCGA-25-1320-01A | 2708.015     | 2416.646    | 5124.661      |
| TCGA-13-0900-01B | 2466.628     | 2663.81     | 5130.438      |
| TCGA-29-1701-01A | 1920.022     | 3304.108    | 5224.13       |
| TCGA-09-1667-01C | 1446.432     | 3800.186    | 5246.619      |
| TCGA-30-1718-01A | 2371.005     | 2879.381    | 5250.386      |
| TCGA-25-2409-01A | 1823.637     | 3448.668    | 5272.305      |
| TCGA-61-1998-01A | 2313.194     | 2978.227    | 5291.421      |
| TCGA-23-1023-01A | 2029.255     | 3335.299    | 5364.553      |
| TCGA-36-1581-01A | 1040.946     | 4349.966    | 5390.912      |
| TCGA-04-1530-01A | 2099.962     | 3311.841    | 5411.803      |
| TCGA-25-2398-01A | 2966.989     | 2464.783    | 5431.772      |
| TCGA-23-1026-01B | 1728.096     | 3737.146    | 5465.241      |
| TCGA-24-1470-01A | 1048.942     | 4423.175    | 5472.116      |
| TCGA-61-1911-01A | 986.0417     | 4497.722    | 5483.763      |
| TCGA-59-2351-01A | 1810.519     | 3684.134    | 5494.653      |
| TCGA-20-1682-01A | 2125.591     | 3389.322    | 5514.913      |
| TCGA-25-1313-01A | 1962.131     | 3564.092    | 5526.224      |
| TCGA-24-2271-01A | 1928.42      | 3615.403    | 5543.823      |

Table SI. Continued.

| Sample           | StromalScore | ImmuneScore | ESTIMATEScore |
|------------------|--------------|-------------|---------------|
| TCGA-24-2288-01A | 1858.412     | 3689.507    | 5547.919      |
| TCGA-24-1842-01A | 1439.955     | 4127.611    | 5567.566      |
| TCGA-25-2392-01A | 1242.451     | 4353.49     | 5595.942      |
| TCGA-30-1892-01A | 3098.116     | 2523.148    | 5621.263      |
| TCGA-61-1737-01A | 2740.381     | 2896.608    | 5636.989      |
| TCGA-13-0924-01A | 1495.048     | 4147.902    | 5642.951      |
| TCGA-13-0883-01A | 2853.369     | 2845.744    | 5699.113      |
| TCGA-23-2078-01A | 2324.369     | 3377.798    | 5702.167      |
| TCGA-24-1435-01A | 2517.338     | 3204.583    | 5721.921      |
| TCGA-29-1785-01A | 1426.969     | 4315.723    | 5742.692      |
| TCGA-61-2113-01A | 2470.187     | 3298.832    | 5769.019      |
| TCGA-13-0795-01A | 1443.218     | 4359.794    | 5803.012      |
| TCGA-24-1924-01A | 1500.105     | 4309.307    | 5809.412      |
| TCGA-29-1777-01A | 2507.018     | 3340.465    | 5847.483      |
| TCGA-25-1630-01A | 1520.417     | 4369.359    | 5889.776      |
| TCGA-30-1891-01A | 2690.949     | 3265.956    | 5956.906      |
| TCGA-24-1563-01A | 2920.908     | 3038.22     | 5959.128      |
| TCGA-31-1951-01A | 2335.925     | 3632.266    | 5968.191      |
| TCGA-13-0908-01B | 2824.194     | 3149.231    | 5973.424      |
| TCGA-61-2009-01A | 2754.976     | 3229.739    | 5984.715      |
| TCGA-24-0968-01A | 2050.203     | 3961.848    | 6012.051      |
| TCGA-13-0885-01A | 1395.201     | 4619.572    | 6014.773      |
| TCGA-25-1635-01A | 2629.954     | 3408.016    | 6037.97       |
| TCGA-25-1326-01A | 2663.896     | 3382.406    | 6046.302      |
| TCGA-29-1688-01A | 1999.228     | 4054.976    | 6054.204      |
| TCGA-29-1781-01A | 1280.725     | 4792.149    | 6072.874      |
| TCGA-30-1860-01A | 1422.214     | 4679.213    | 6101.427      |
| TCGA-24-2267-01A | 1388.53      | 4749.68     | 6138.21       |
| TCGA-24-2261-01A | 1970.252     | 4170.214    | 6140.466      |
| TCGA-24-1427-01A | 2795.677     | 3350.084    | 6145.76       |
| TCGA-31-1946-01A | 2763.071     | 3446.778    | 6209.849      |
| TCGA-24-1546-01A | 3182.565     | 3125.5      | 6308.065      |
| TCGA-29-1690-01A | 2162.124     | 4164.165    | 6326.289      |
| TCGA-57-1585-01A | 3132.983     | 3256.461    | 6389.444      |
| TCGA-24-1417-01A | 2268.491     | 4122.908    | 6391.398      |
| TCGA-13-0911-01A | 2220.431     | 4180.112    | 6400.543      |
| TCGA-30-1857-01A | 2685.784     | 3746.407    | 6432.192      |
| TCGA-24-1553-01A | 1254.021     | 5189.513    | 6443.533      |
| TCGA-24-2289-01A | 3143.204     | 3323.565    | 6466.769      |
| TCGA-59-2354-01A | 2803.715     | 3669.003    | 6472.719      |
| TCGA-36-1580-01A | 3042.668     | 3455.864    | 6498.532      |
| TCGA-13-1507-01A | 2429.86      | 4108.533    | 6538.392      |
| TCGA-24-1847-01A | 1565.388     | 4976.379    | 6541.767      |
| TCGA-20-0987-01A | 1174.704     | 5381.833    | 6556.537      |

ESTIMATE, Estimation of STromal and Immune cells in MAlignant Tumor tissues using Expression data; TCGA, The Cancer Genome Atlas.

Table SII. All genes that showed significant association with prognosis from first-time Kaplan-Meier analysis results.

---

Gene name

---

AKNAD1  
APOA5  
APOC3  
ATP1B2  
ATP2B3  
C1orf87  
CACNG6  
CDC20B  
CYP4F2  
DKK4  
DLK1  
DMRTB1  
FABP7  
FOXI2  
FREM2  
GABRG2  
GCK  
KCNG1  
KNCN  
LCN9  
LRTM2  
NAT16  
ONECUT1  
PCDHB6  
PIANP  
PIK3C2G  
PNPLA5  
RBP3  
SATL1  
SBK3  
SLC30A10  
SPATA45  
TMEM196  
UGT1A6  
ZNF729  
ZNF99  
ZSCAN4

---

Table SIII. Results of the univariate Cox's regression model.

| Prognostic factor | HR       | HR.95L   | HR.95H   | P-value  |
|-------------------|----------|----------|----------|----------|
| Age               | 1.020017 | 1.007856 | 1.032325 | 0.001201 |
| Histologic grade  | 1.070354 | 0.759495 | 1.508448 | 0.697718 |
| Tumor site        | 1.108038 | 0.937075 | 1.310192 | 0.230197 |
| CDC20B            | 1.047964 | 1.014111 | 1.082946 | 0.005168 |
| FOXI2             | 1.045252 | 1.01331  | 1.0782   | 0.00519  |
| UGT1A6            | 0.949669 | 0.91438  | 0.98632  | 0.007519 |
| PNPLA5            | 1.040709 | 1.00937  | 1.073022 | 0.010534 |
| APOA5             | 0.965004 | 0.938127 | 0.992652 | 0.013446 |
| SATL1             | 0.962862 | 0.934191 | 0.992413 | 0.014137 |
| LCN9              | 1.040059 | 1.007099 | 1.074098 | 0.016826 |
| LRTM2             | 1.033659 | 1.005752 | 1.06234  | 0.017753 |
| ONECUT1           | 1.035846 | 1.0057   | 1.066896 | 0.019431 |
| DMRTB1            | 0.969809 | 0.94471  | 0.995575 | 0.021936 |
| PIANP             | 1.071268 | 1.009974 | 1.136282 | 0.022016 |
| ZNF729            | 0.970178 | 0.94415  | 0.996924 | 0.02911  |
| TMEM196           | 1.033472 | 1.00312  | 1.064743 | 0.030405 |
| ZSCAN4            | 0.968999 | 0.941683 | 0.997107 | 0.030886 |

HR, hazard ratio.

Table SIV. Prognostic factors associated with survival of ovarian carcinoma involved in the Lasso regression analysis.

---

Prognostic factors

---

Age<sup>a</sup>  
Tumor site  
Clinical stage<sup>a</sup>  
Histologic grade  
CDC20B<sup>a</sup>  
UGT1A6<sup>a</sup>  
PNPLA5<sup>a</sup>  
APOA5<sup>a</sup>  
SATL1<sup>a</sup>  
ZSCAN4<sup>a</sup>

---

<sup>a</sup>P<0.05. APOA5, apolipoprotein A5; CDC20B, cell division cycle 20B; PNPLA5, patatin like phospholipase domain containing 5; SATL1, spermidine/spermine N1-acetyl transferase like 1; UGT1A6, UDP glucuronosyltransferase family 1 member A6; ZSCAN4, zinc finger and SCAN domain containing 4.

---
